# Supplementary material for: Dual mutations collaboration mechanism with elites guiding and inferiors eliminating techniques for differential evolution
Source: Springer Nature journal article supplement (doi:10.1007/s00500-021-06454-1), 2021-11-09
Supplement: 500_2021_6454_MOESM1_ESM.pdf [file 500_2021_6454_MOESM1_ESM.pdf]

Supporting Document of “Dual Mutations  
Collaboration Mechanism with Elites Guiding and  
Inferiors Eliminating Techniques for Differential  
Evolution”



TABLE A3: Mean and standard deviation of function error values obtained by DMIE-DE and its three versions on 30D test functions in CEC2017 over 50 independent runs.

| Func.    | DMIE-DE1        |          | DMIE-DE2        |          | DMIE-DE3        |          | DMIE-DE         |          |
|----------|-----------------|----------|-----------------|----------|-----------------|----------|-----------------|----------|
|          | Mean            | Std.     | Mean            | Std.     | Mean            | Std.     | Mean            | Std.     |
| $f_1$    | 1.34E-14        | 4.46E-15 | 1.68E-14        | 5.52E-15 | <b>8.81E-15</b> | 6.97E-15 | <b>8.81E-15</b> | 6.97E-15 |
| $f_3$    | 1.10E-13        | 4.21E-14 | 2.13E-13        | 8.02E-14 | <b>7.05E-14</b> | 2.71E-14 | 7.62E-14        | 2.95E-14 |
| $f_4$    | <b>4.04E+01</b> | 2.86E+01 | 4.80E+01        | 2.44E+01 | 5.28E+01        | 1.91E+01 | 5.46E+01        | 1.58E+01 |
| $f_5$    | 3.13E+01        | 1.00E+01 | 4.28E+01        | 1.09E+01 | 3.05E+01        | 9.63E+00 | <b>3.01E+01</b> | 1.03E+01 |
| $f_6$    | 4.44E-03        | 1.23E-02 | 2.59E-02        | 3.60E-02 | 4.75E-04        | 1.29E-03 | <b>1.41E-06</b> | 7.12E-06 |
| $f_7$    | 5.90E+01        | 1.03E+01 | 7.72E+01        | 1.31E+01 | 5.95E+01        | 1.04E+01 | <b>5.77E+01</b> | 1.06E+01 |
| $f_8$    | 3.21E+01        | 8.36E+00 | 4.36E+01        | 1.24E+01 | 3.18E+01        | 9.15E+00 | <b>3.06E+01</b> | 8.74E+00 |
| $f_9$    | 7.63E-01        | 9.34E-01 | 8.25E+00        | 8.44E+00 | 3.86E-01        | 5.52E-01 | <b>7.08E-02</b> | 1.70E-01 |
| $f_{10}$ | <b>2.23E+03</b> | 5.16E+02 | 2.85E+03        | 4.96E+02 | 2.64E+03        | 7.35E+02 | 3.12E+03        | 6.85E+02 |
| $f_{11}$ | 4.53E+01        | 2.85E+01 | 6.00E+01        | 3.59E+01 | 3.60E+01        | 2.74E+01 | <b>3.50E+01</b> | 2.74E+01 |
| $f_{12}$ | 1.10E+03        | 4.21E+02 | 3.74E+03        | 3.69E+03 | 1.26E+03        | 3.12E+02 | <b>9.72E+02</b> | 4.26E+02 |
| $f_{13}$ | 3.09E+01        | 1.65E+01 | 7.02E+01        | 9.70E+01 | 3.37E+01        | 8.04E+00 | <b>2.66E+01</b> | 9.49E+00 |
| $f_{14}$ | <b>2.69E+01</b> | 3.06E+00 | 4.22E+01        | 1.02E+01 | 3.24E+01        | 4.16E+00 | 2.87E+01        | 5.53E+00 |
| $f_{15}$ | 1.92E+01        | 1.20E+01 | 3.81E+01        | 3.33E+01 | 1.93E+01        | 1.08E+01 | <b>1.32E+01</b> | 6.31E+00 |
| $f_{16}$ | <b>2.13E+02</b> | 1.40E+02 | 4.72E+02        | 2.68E+02 | 3.02E+02        | 1.98E+02 | 3.39E+02        | 1.99E+02 |
| $f_{17}$ | 7.42E+01        | 3.58E+01 | 8.04E+01        | 6.55E+01 | 9.30E+01        | 6.49E+01 | <b>6.72E+01</b> | 3.88E+01 |
| $f_{18}$ | 4.30E+01        | 2.48E+01 | 6.25E+01        | 4.39E+01 | 3.22E+01        | 1.44E+01 | <b>3.09E+01</b> | 1.24E+01 |
| $f_{19}$ | 1.16E+01        | 3.83E+00 | 3.26E+01        | 3.20E+01 | 1.05E+01        | 3.02E+00 | <b>8.66E+00</b> | 2.93E+00 |
| $f_{20}$ | <b>4.50E+01</b> | 3.32E+01 | 8.84E+01        | 9.88E+01 | 6.79E+01        | 6.46E+01 | 7.81E+01        | 6.46E+01 |
| $f_{21}$ | <b>2.15E+02</b> | 4.46E+00 | 2.46E+02        | 1.12E+01 | 2.35E+02        | 9.41E+00 | 2.32E+02        | 7.62E+00 |
| $f_{22}$ | <b>1.00E+02</b> | 7.44E-01 | 3.19E+02        | 7.68E+02 | <b>1.00E+02</b> | 5.88E-01 | <b>1.00E+02</b> | 0.00E+00 |
| $f_{23}$ | 3.81E+02        | 1.04E+01 | 3.93E+02        | 1.17E+01 | 3.81E+02        | 9.72E+00 | 3.79E+02        | 1.10E+01 |
| $f_{24}$ | 4.50E+02        | 9.96E+00 | 4.65E+02        | 1.31E+01 | 4.53E+02        | 9.81E+00 | <b>4.44E+02</b> | 1.05E+01 |
| $f_{25}$ | 3.88E+02        | 7.69E+00 | <b>3.87E+02</b> | 8.55E-01 | <b>3.87E+02</b> | 4.77E-01 | <b>3.87E+02</b> | 4.26E-02 |
| $f_{26}$ | <b>1.06E+03</b> | 1.92E+02 | 1.48E+03        | 1.69E+02 | 1.30E+03        | 1.95E+02 | 1.20E+03        | 1.01E+02 |
| $f_{27}$ | 5.06E+02        | 8.23E+00 | 5.11E+02        | 8.16E+00 | 5.08E+02        | 6.87E+00 | <b>5.02E+02</b> | 9.19E+00 |
| $f_{28}$ | 3.86E+02        | 5.29E+01 | <b>3.54E+02</b> | 6.31E+01 | 3.54E+02        | 6.06E+01 | 3.60E+02        | 5.93E+01 |
| $f_{29}$ | <b>4.48E+02</b> | 2.50E+01 | 5.57E+02        | 1.12E+02 | 4.71E+02        | 4.13E+01 | <b>4.48E+02</b> | 3.35E+01 |
| $f_{30}$ | 2.15E+03        | 1.75E+02 | 2.14E+03        | 1.65E+02 | 2.06E+03        | 1.44E+02 | <b>2.04E+03</b> | 8.34E+01 |

TABLE A4: Mean and standard deviation of function error values obtained by DMIE-DE and its three versions on 100D test functions in CEC2017 over 50 independent runs.

| Func.    | DMIE-DE1        |          | DMIE-DE2        |          | DMIE-DE3        |          | DMIE-DE         |          |
|----------|-----------------|----------|-----------------|----------|-----------------|----------|-----------------|----------|
|          | Mean            | Std.     | Mean            | Std.     | Mean            | Std.     | Mean            | Std.     |
| $f_1$    | <b>1.36E-13</b> | 2.89E-13 | 3.62E-10        | 1.14E-09 | 5.42E-09        | 6.94E-09 | 1.99E-10        | 2.78E-10 |
| $f_3$    | <b>2.05E-04</b> | 2.31E-04 | 1.09E-01        | 3.97E-01 | 5.16E-01        | 5.52E-01 | 2.23E-01        | 2.13E-01 |
| $f_4$    | <b>1.11E+02</b> | 7.01E+01 | 1.90E+02        | 5.77E+01 | 1.55E+02        | 5.37E+01 | 1.59E+02        | 4.94E+01 |
| $f_5$    | 1.67E+02        | 5.91E+01 | 1.54E+02        | 2.55E+01 | 1.11E+02        | 2.18E+01 | <b>9.35E+01</b> | 1.76E+01 |
| $f_6$    | 5.95E-01        | 3.84E-01 | 3.91E-01        | 2.77E-01 | 5.07E-02        | 4.21E-02 | <b>2.25E-03</b> | 3.77E-03 |
| $f_7$    | 3.81E+02        | 2.13E+01 | 3.14E+02        | 3.30E+01 | 2.15E+02        | 1.67E+01 | <b>2.00E+02</b> | 1.68E+01 |
| $f_8$    | 1.87E+02        | 4.55E+01 | 1.51E+02        | 2.17E+01 | 1.13E+02        | 1.97E+01 | <b>1.02E+02</b> | 1.69E+01 |
| $f_9$    | 2.63E+01        | 8.88E+00 | 1.72E+02        | 1.03E+02 | 1.75E+01        | 9.30E+00 | <b>6.24E+00</b> | 4.77E+00 |
| $f_{10}$ | 1.91E+04        | 6.12E+02 | 1.27E+04        | 3.00E+03 | <b>1.13E+04</b> | 1.33E+03 | 1.61E+04        | 5.79E+03 |
| $f_{11}$ | 8.86E+02        | 2.00E+02 | <b>5.02E+02</b> | 1.50E+02 | 5.71E+02        | 1.23E+02 | 5.42E+02        | 1.56E+02 |
| $f_{12}$ | <b>3.09E+04</b> | 1.20E+04 | 5.80E+04        | 2.43E+04 | 7.97E+04        | 5.12E+04 | 5.74E+04        | 3.50E+04 |
| $f_{13}$ | 1.36E+03        | 1.20E+03 | <b>4.52E+02</b> | 4.17E+02 | 1.10E+03        | 1.01E+03 | 9.53E+02        | 8.85E+02 |
| $f_{14}$ | 4.14E+02        | 8.38E+01 | 4.13E+02        | 1.09E+02 | <b>3.22E+02</b> | 6.29E+01 | 3.28E+02        | 6.62E+01 |
| $f_{15}$ | 3.17E+02        | 7.83E+01 | 4.50E+02        | 4.60E+02 | 3.23E+02        | 8.03E+01 | <b>3.17E+02</b> | 7.24E+01 |
| $f_{16}$ | 2.37E+03        | 4.54E+02 | 2.36E+03        | 5.68E+02 | 2.10E+03        | 5.01E+02 | <b>1.97E+03</b> | 4.37E+02 |
| $f_{17}$ | 1.84E+03        | 2.54E+02 | 1.64E+03        | 3.57E+02 | <b>1.28E+03</b> | 4.27E+02 | 1.35E+03        | 5.16E+02 |
| $f_{18}$ | 3.16E+02        | 7.88E+01 | 1.06E+03        | 9.03E+02 | 2.59E+02        | 7.35E+01 | <b>2.50E+02</b> | 7.36E+01 |
| $f_{19}$ | 2.33E+02        | 6.14E+01 | 2.19E+02        | 5.40E+01 | 2.26E+02        | 5.37E+01 | <b>2.19E+02</b> | 4.35E+01 |
| $f_{20}$ | 2.24E+03        | 2.82E+02 | 1.76E+03        | 3.91E+02 | <b>1.42E+03</b> | 3.50E+02 | 1.95E+03        | 8.36E+02 |
| $f_{21}$ | 3.63E+02        | 6.15E+01 | 3.84E+02        | 3.14E+01 | 3.38E+02        | 1.80E+01 | <b>3.28E+02</b> | 1.96E+01 |
| $f_{22}$ | 1.99E+04        | 6.08E+02 | 1.32E+04        | 2.39E+03 | <b>1.22E+04</b> | 2.36E+03 | 1.85E+04        | 5.66E+03 |
| $f_{23}$ | <b>6.24E+02</b> | 1.78E+01 | 7.04E+02        | 2.37E+01 | 6.59E+02        | 1.98E+01 | 6.28E+02        | 2.66E+01 |
| $f_{24}$ | <b>9.77E+02</b> | 1.95E+01 | 1.06E+03        | 3.12E+01 | 9.96E+02        | 2.39E+01 | 9.83E+02        | 2.52E+01 |
| $f_{25}$ | 7.32E+02        | 5.73E+01 | <b>7.25E+02</b> | 5.18E+01 | 7.31E+02        | 5.11E+01 | 7.35E+02        | 4.36E+01 |
| $f_{26}$ | 4.13E+03        | 2.26E+02 | 4.99E+03        | 2.86E+02 | 4.25E+03        | 2.67E+02 | <b>3.98E+03</b> | 2.22E+02 |
| $f_{27}$ | 6.80E+02        | 3.03E+01 | 6.73E+02        | 3.09E+01 | 6.48E+02        | 2.85E+01 | <b>6.45E+02</b> | 2.96E+01 |
| $f_{28}$ | <b>5.25E+02</b> | 3.11E+01 | 5.29E+02        | 3.21E+01 | 5.42E+02        | 3.22E+01 | 5.32E+02        | 3.11E+01 |
| $f_{29}$ | 2.07E+03        | 3.34E+02 | 2.41E+03        | 4.06E+02 | 1.83E+03        | 3.32E+02 | <b>1.71E+03</b> | 3.54E+02 |
| $f_{30}$ | 2.67E+03        | 2.44E+02 | 2.64E+03        | 2.29E+02 | 2.56E+03        | 2.14E+02 | <b>2.46E+03</b> | 1.61E+02 |

TABLE A5: Mean and standard deviation of function error values obtained by DMIE-DE with different  $gip$  values on 30D test functions in CEC2017 over 50 independent runs.

| Func.    | $gip = 200$     |          | $gip = 300$     |          | $gip = 400$     |          | $gip = 500$     |          | $gip = 600$     |          |
|----------|-----------------|----------|-----------------|----------|-----------------|----------|-----------------|----------|-----------------|----------|
|          | Mean            | Std.     | Mean            | Std.     | Mean            | Std.     | Mean            | Std.     | Mean            | Std.     |
| $f_1$    | 1.08E-14        | 6.13E-15 | 8.53E-15        | 7.03E-15 | 8.81E-15        | 6.97E-15 | 8.53E-15        | 7.03E-15 | <b>8.24E-15</b> | 7.09E-15 |
| $f_3$    | 8.30E+02        | 5.87E+03 | 7.50E-14        | 2.91E-14 | 7.62E-14        | 2.95E-14 | 8.30E-14        | 3.29E-14 | <b>5.68E-14</b> | 1.15E-14 |
| $f_4$    | 5.69E+01        | 2.08E+01 | 5.69E+01        | 1.19E+01 | 5.46E+01        | 1.58E+01 | <b>5.42E+01</b> | 1.76E+01 | 5.99E+01        | 1.83E+01 |
| $f_5$    | <b>3.00E+01</b> | 1.01E+01 | 3.98E+01        | 9.90E+00 | 3.01E+01        | 1.03E+01 | 3.28E+01        | 1.25E+01 | 3.19E+01        | 1.14E+01 |
| $f_6$    | 7.43E-01        | 2.94E-06 | 4.96E-06        | 1.59E-06 | 1.41E-06        | 7.12E-06 | <b>1.02E-06</b> | 2.53E-06 | 3.66E-06        | 1.25E-06 |
| $f_7$    | 5.99E+01        | 1.06E+01 | 6.13E+01        | 1.33E+01 | <b>5.77E+01</b> | 1.06E+01 | 6.17E+01        | 1.40E+01 | 6.17E+01        | 1.23E+01 |
| $f_8$    | 3.20E+01        | 8.86E+00 | 3.13E+01        | 1.18E+01 | 3.06E+01        | 8.74E+00 | <b>3.03E+01</b> | 1.03E+01 | 3.90E+01        | 1.02E+01 |
| $f_9$    | 9.79E-01        | 2.49E-01 | <b>5.25E-02</b> | 1.31E-01 | 7.08E-02        | 1.70E-01 | 1.21E-01        | 4.12E-01 | 1.34E-01        | 3.96E-01 |
| $f_{10}$ | 3.93E+03        | 6.09E+02 | 3.98E+03        | 6.89E+02 | 3.12E+03        | 6.85E+02 | <b>2.90E+03</b> | 7.64E+02 | 3.14E+03        | 7.50E+02 |
| $f_{11}$ | <b>3.46E+01</b> | 2.41E+01 | 3.50E+01        | 1.58E+01 | 3.50E+01        | 2.74E+01 | 3.58E+01        | 2.82E+01 | 3.60E+01        | 2.34E+01 |
| $f_{12}$ | 8.62E+02        | 3.43E+02 | 1.01E+03        | 3.51E+02 | 9.72E+02        | 4.26E+02 | <b>8.37E+02</b> | 3.35E+02 | 9.22E+02        | 3.06E+02 |
| $f_{13}$ | 2.85E+01        | 8.90E+00 | 2.89E+01        | 1.05E+01 | 2.66E+01        | 9.49E+00 | 2.78E+01        | 1.23E+01 | <b>2.57E+01</b> | 7.84E+00 |
| $f_{14}$ | 2.99E+01        | 7.97E+00 | 2.99E+01        | 4.05E+00 | 2.87E+01        | 5.53E+00 | 2.86E+01        | 6.47E+00 | <b>2.78E+01</b> | 7.05E+00 |
| $f_{15}$ | 1.35E+01        | 7.29E+00 | 1.36E+01        | 7.60E+00 | <b>1.32E+01</b> | 6.31E+00 | 1.54E+01        | 9.00E+00 | 1.49E+01        | 9.24E+00 |
| $f_{16}$ | 3.69E+02        | 1.93E+02 | <b>2.55E+02</b> | 1.77E+02 | 3.39E+02        | 1.99E+02 | 2.95E+02        | 1.85E+02 | 5.71E+02        | 2.12E+02 |
| $f_{17}$ | <b>6.58E+01</b> | 4.03E+01 | 7.20E+01        | 3.69E+01 | 6.72E+01        | 3.88E+01 | 6.72E+01        | 3.27E+01 | 7.04E+01        | 4.66E+01 |
| $f_{18}$ | 3.30E+01        | 1.25E+01 | 3.10E+01        | 9.61E+00 | <b>3.09E+01</b> | 1.24E+01 | 3.13E+01        | 1.79E+01 | 3.13E+01        | 1.17E+01 |
| $f_{19}$ | 8.71E+00        | 2.90E+00 | 8.84E+00        | 2.56E+00 | 8.66E+00        | 2.93E+00 | <b>8.12E+00</b> | 3.01E+00 | 8.77E+00        | 3.09E+00 |
| $f_{20}$ | 7.99E+01        | 6.19E+01 | 7.54E+01        | 5.02E+01 | 7.81E+01        | 6.46E+01 | <b>6.86E+01</b> | 5.00E+01 | 8.85E+01        | 5.21E+01 |
| $f_{21}$ | 2.34E+02        | 1.10E+01 | 2.39E+02        | 8.67E+00 | 2.32E+02        | 7.62E+00 | <b>2.30E+02</b> | 9.66E+00 | 2.38E+02        | 1.02E+01 |
| $f_{22}$ | <b>1.00E+02</b> | 0.00E+00 | 1.07E+02        | 5.16E+01 | <b>1.00E+02</b> | 0.00E+00 | <b>1.00E+02</b> | 0.00E+00 | 1.41E+02        | 2.88E+02 |
| $f_{23}$ | 3.79E+02        | 1.03E+01 | 3.80E+02        | 1.14E+01 | <b>3.79E+02</b> | 1.10E+01 | 3.81E+02        | 1.41E+01 | 3.82E+02        | 1.14E+01 |
| $f_{24}$ | 4.50E+02        | 9.57E+00 | 4.52E+02        | 1.22E+01 | <b>4.44E+02</b> | 1.05E+01 | 4.53E+02        | 1.14E+01 | 4.51E+02        | 1.08E+01 |
| $f_{25}$ | <b>3.87E+02</b> | 6.72E-01 | <b>3.87E+02</b> | 5.35E-02 | <b>3.87E+02</b> | 4.26E-02 | <b>3.87E+02</b> | 7.33E-02 | <b>3.87E+02</b> | 7.44E-02 |
| $f_{26}$ | 1.24E+03        | 1.12E+02 | 1.20E+03        | 1.02E+02 | <b>1.20E+03</b> | 1.01E+02 | 1.27E+03        | 1.26E+02 | 1.20E+03        | 1.13E+02 |
| $f_{27}$ | 5.02E+02        | 7.31E+00 | 5.02E+02        | 6.02E+00 | <b>5.02E+02</b> | 9.19E+00 | 5.03E+02        | 6.99E+00 | 5.03E+02        | 7.29E+00 |
| $f_{28}$ | 3.66E+02        | 6.13E+01 | <b>3.22E+02</b> | 4.44E+01 | 3.60E+02        | 5.93E+01 | 3.27E+02        | 5.31E+01 | 3.40E+02        | 5.72E+01 |
| $f_{29}$ | 4.51E+02        | 4.43E+01 | 4.55E+02        | 3.25E+01 | <b>4.48E+02</b> | 3.35E+01 | 4.59E+02        | 5.01E+01 | 4.60E+02        | 5.31E+01 |
| $f_{30}$ | 2.05E+03        | 8.15E+01 | 2.07E+03        | 1.55E+02 | <b>2.04E+03</b> | 8.34E+01 | 2.04E+03        | 1.01E+02 | 2.06E+03        | 9.83E+01 |

TABLE A6: Mean and standard deviation of function error values obtained by DMIE-DE with different  $gip$  values on 100D test functions in CEC2017 over 50 independent runs.

| Func.    | $gip = 200$     |          | $gip = 300$     |          | $gip = 400$     |          | $gip = 500$     |          | $gip = 600$     |          |
|----------|-----------------|----------|-----------------|----------|-----------------|----------|-----------------|----------|-----------------|----------|
|          | Mean            | Std.     | Mean            | Std.     | Mean            | Std.     | Mean            | Std.     | Mean            | Std.     |
| $f_1$    | 1.69E-10        | 4.34E-11 | <b>1.37E-10</b> | 2.55E-10 | 1.99E-10        | 2.78E-10 | 3.24E-10        | 4.06E-10 | 6.16E-10        | 7.67E-10 |
| $f_3$    | 6.87E-01        | 8.35E-02 | <b>1.25E-01</b> | 9.50E-02 | 2.23E-01        | 2.13E-01 | 3.23E-01        | 3.75E-01 | 9.09E+01        | 6.41E+02 |
| $f_4$    | 1.49E+02        | 6.07E+01 | <b>1.42E+02</b> | 5.46E+01 | 1.59E+02        | 4.94E+01 | 1.71E+02        | 4.02E+01 | 1.60E+02        | 5.09E+01 |
| $f_5$    | 1.06E+02        | 2.18E+01 | 1.01E+02        | 1.83E+01 | <b>9.35E+01</b> | 1.76E+01 | 1.06E+02        | 1.66E+01 | 9.69E+01        | 1.63E+01 |
| $f_6$    | 2.75E-03        | 5.21E-03 | 3.05E-03        | 4.66E-03 | 2.25E-03        | 3.77E-03 | <b>1.82E-03</b> | 3.41E-03 | 2.34E-03        | 3.75E-03 |
| $f_7$    | 1.99E+02        | 2.02E+01 | 2.02E+02        | 2.07E+01 | 2.00E+02        | 1.68E+01 | <b>1.96E+02</b> | 1.43E+01 | 1.99E+02        | 1.59E+01 |
| $f_8$    | 1.90E+02        | 1.96E+01 | 9.70E+01        | 1.79E+01 | 1.02E+02        | 1.69E+01 | 1.04E+02        | 4.58E+01 | <b>9.50E+01</b> | 1.83E+01 |
| $f_9$    | 6.74E+00        | 7.08E+00 | 7.97E+00        | 7.91E+00 | 6.24E+00        | 4.77E+00 | <b>5.45E+00</b> | 3.22E+00 | 6.86E+00        | 4.53E+00 |
| $f_{10}$ | 1.56E+04        | 5.20E+03 | 1.72E+04        | 5.58E+03 | 1.61E+04        | 5.79E+03 | <b>1.54E+04</b> | 5.78E+03 | 1.75E+04        | 5.76E+03 |
| $f_{11}$ | 5.79E+02        | 1.43E+02 | 5.70E+02        | 1.40E+02 | <b>5.42E+02</b> | 1.56E+02 | 5.88E+02        | 1.57E+02 | 5.89E+02        | 1.34E+02 |
| $f_{12}$ | 5.34E+04        | 2.67E+04 | <b>4.60E+04</b> | 1.77E+04 | 5.74E+04        | 3.50E+04 | 5.67E+04        | 2.42E+04 | 5.86E+04        | 3.47E+04 |
| $f_{13}$ | 9.98E+02        | 7.71E+02 | 9.82E+02        | 9.71E+02 | 9.53E+02        | 8.85E+02 | <b>8.16E+02</b> | 8.16E+02 | 8.85E+02        | 8.27E+02 |
| $f_{14}$ | <b>3.13E+02</b> | 6.42E+01 | 3.29E+02        | 6.17E+01 | 3.28E+02        | 6.62E+01 | 3.32E+02        | 5.31E+01 | 3.28E+02        | 6.79E+01 |
| $f_{15}$ | 3.15E+02        | 7.46E+01 | 3.28E+02        | 7.58E+01 | 3.17E+02        | 7.24E+01 | <b>3.08E+02</b> | 6.72E+01 | 3.15E+02        | 7.43E+01 |
| $f_{16}$ | 2.08E+03        | 5.96E+02 | <b>1.95E+03</b> | 4.40E+02 | 1.97E+03        | 4.37E+02 | 2.17E+03        | 5.21E+02 | 2.07E+03        | 4.41E+02 |
| $f_{17}$ | 1.40E+03        | 3.64E+02 | 1.31E+03        | 3.83E+02 | 1.35E+03        | 5.16E+02 | <b>1.31E+03</b> | 4.32E+02 | 1.35E+03        | 4.27E+02 |
| $f_{18}$ | <b>2.36E+02</b> | 6.93E+01 | 2.46E+02        | 7.82E+01 | 2.50E+02        | 7.36E+01 | 2.58E+02        | 7.66E+01 | 2.47E+02        | 7.57E+01 |
| $f_{19}$ | 2.12E+02        | 5.19E+01 | <b>2.05E+02</b> | 3.70E+01 | 2.19E+02        | 4.35E+01 | 2.20E+02        | 5.21E+01 | 2.15E+02        | 5.63E+01 |
| $f_{20}$ | 2.00E+03        | 6.66E+02 | 1.90E+03        | 6.63E+02 | 1.95E+03        | 8.36E+02 | <b>1.82E+03</b> | 7.84E+02 | 2.01E+03        | 8.13E+02 |
| $f_{21}$ | 3.24E+02        | 1.70E+01 | 3.24E+02        | 1.96E+01 | 3.28E+02        | 1.96E+01 | 3.24E+02        | 1.85E+01 | <b>3.22E+02</b> | 1.80E+01 |
| $f_{22}$ | 2.00E+04        | 5.55E+03 | 1.93E+04        | 5.42E+03 | 1.85E+04        | 5.66E+03 | 1.92E+04        | 5.62E+03 | <b>1.72E+04</b> | 5.80E+03 |
| $f_{23}$ | 6.28E+02        | 2.24E+01 | <b>6.24E+02</b> | 2.09E+01 | 6.28E+02        | 2.66E+01 | 6.30E+02        | 2.18E+01 | 6.34E+02        | 2.10E+01 |
| $f_{24}$ | <b>9.76E+02</b> | 1.88E+01 | 9.78E+02        | 1.93E+01 | 9.83E+02        | 2.52E+01 | 9.80E+02        | 1.83E+01 | 9.76E+02        | 1.95E+01 |
| $f_{25}$ | 7.37E+02        | 5.02E+01 | 7.34E+02        | 4.70E+01 | 7.35E+02        | 4.36E+01 | <b>7.29E+02</b> | 5.14E+01 | 7.42E+02        | 4.20E+01 |
| $f_{26}$ | 4.03E+03        | 2.94E+02 | 4.04E+03        | 2.12E+02 | <b>3.98E+03</b> | 2.22E+02 | 4.08E+03        | 2.28E+02 | 4.00E+03        | 2.47E+02 |
| $f_{27}$ | 6.42E+02        | 2.42E+01 | 6.43E+02        | 2.82E+01 | 6.45E+02        | 2.96E+01 | <b>6.40E+02</b> | 2.78E+01 | 6.47E+02        | 2.58E+01 |
| $f_{28}$ | 5.37E+02        | 3.68E+01 | 5.34E+02        | 2.89E+01 | <b>5.32E+02</b> | 3.11E+01 | 5.36E+02        | 3.37E+01 | 5.36E+02        | 3.65E+01 |
| $f_{29}$ | <b>1.69E+03</b> | 3.29E+02 | 1.74E+03        | 3.84E+02 | 1.71E+03        | 3.54E+02 | 1.74E+03        | 3.74E+02 | 1.73E+03        | 3.11E+02 |
| $f_{30}$ | 2.47E+03        | 1.66E+02 | 2.52E+03        | 1.81E+02 | <b>2.46E+03</b> | 1.61E+02 | 2.48E+03        | 2.02E+02 | 2.51E+03        | 2.24E+02 |

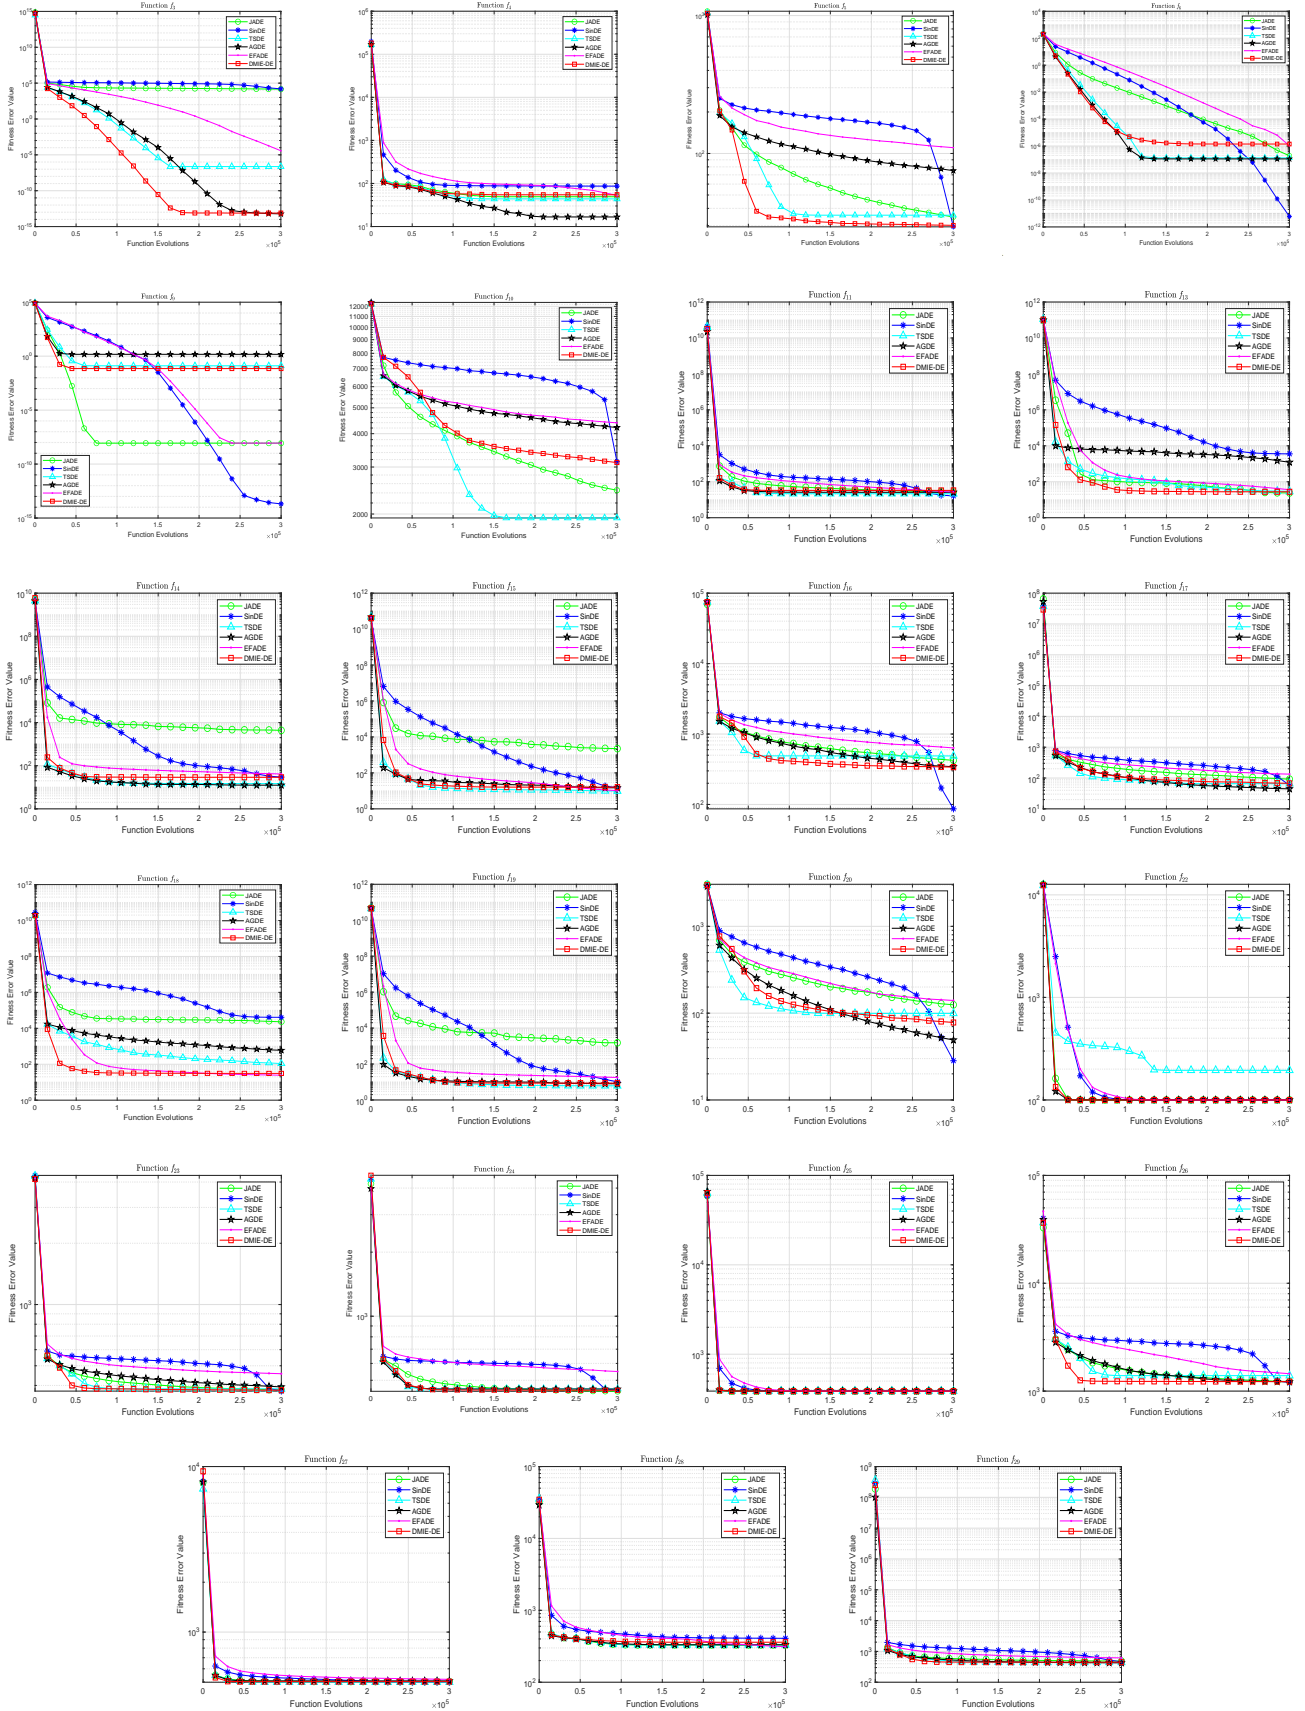

Fig. A1: The convergence process of the mean fitness errors derived from different variants on all 30D benchmark functions except for those presented in the article's main body.

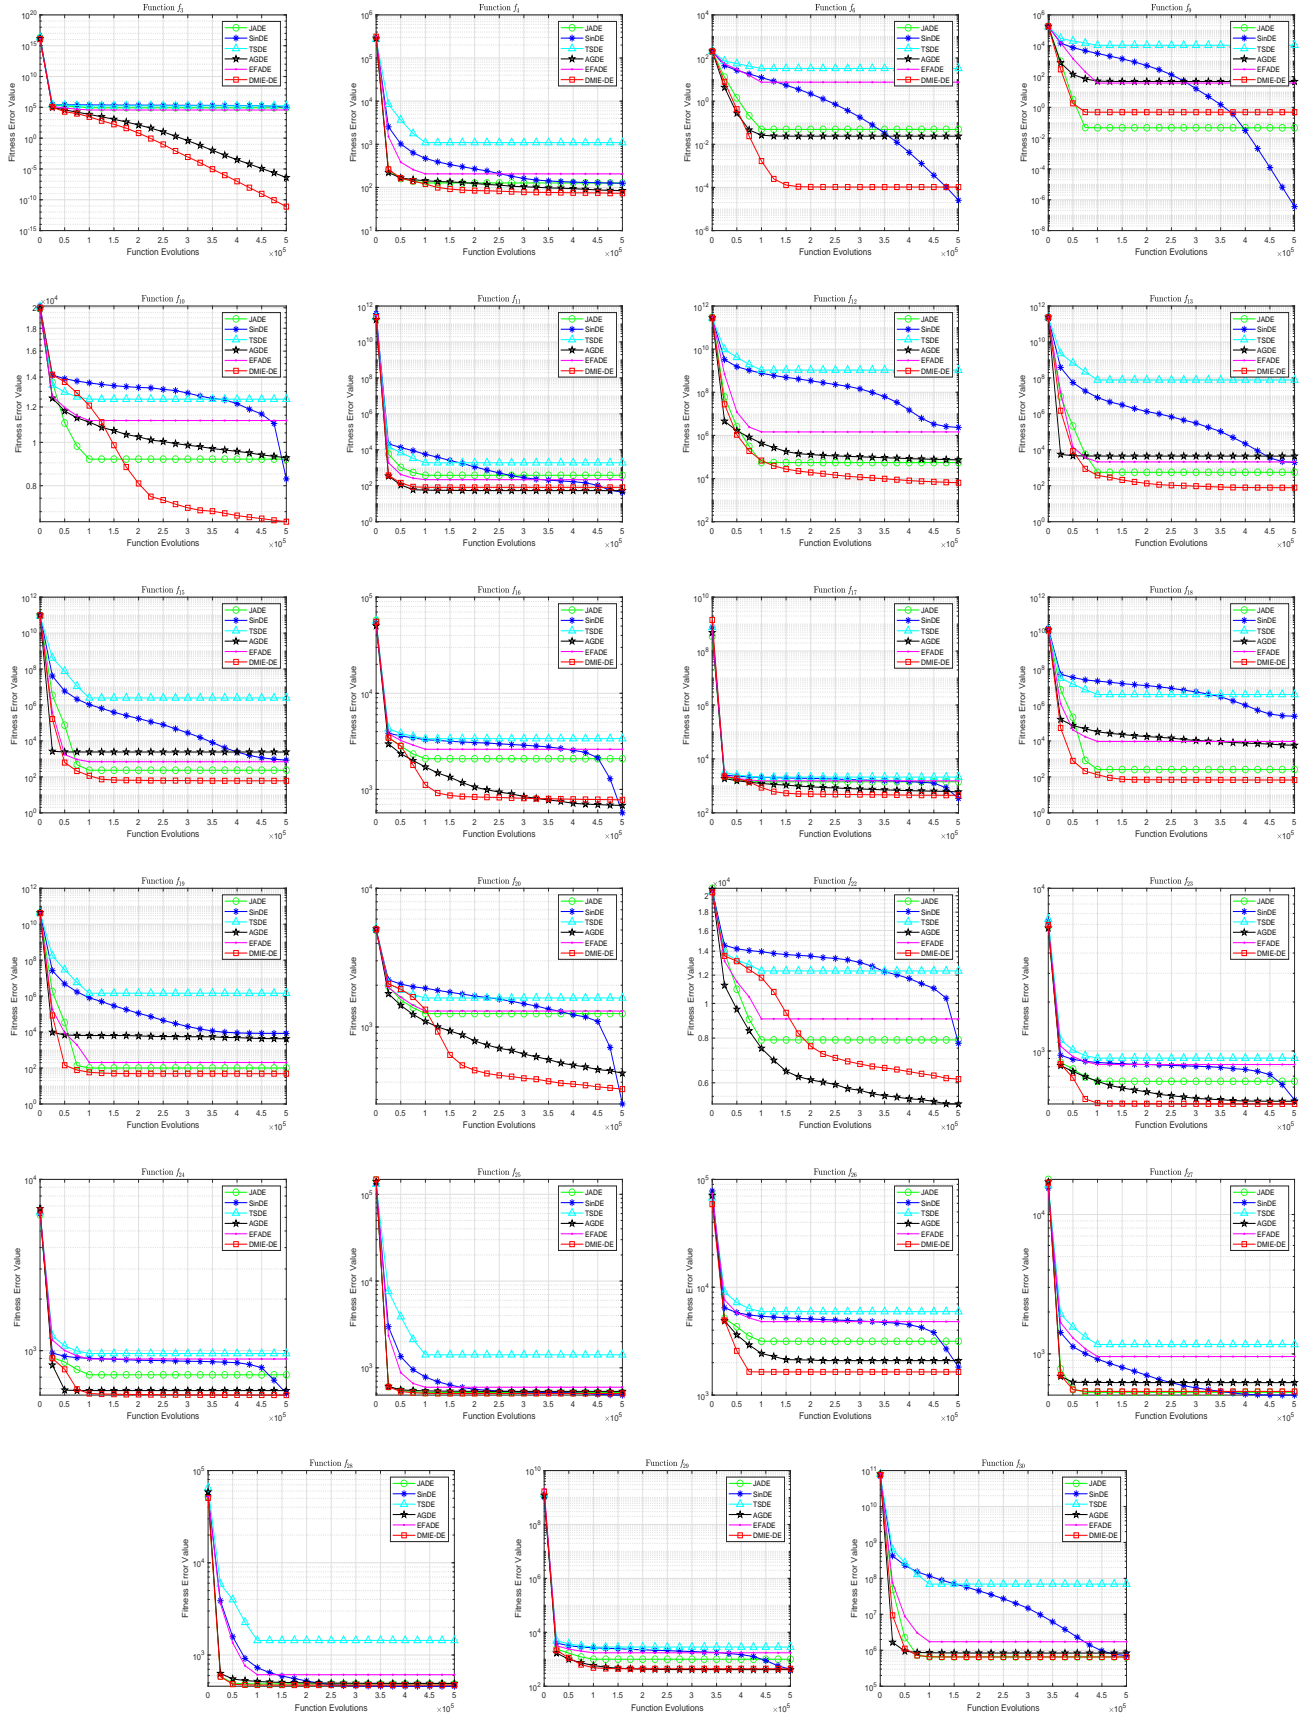

Fig. A2: The convergence process of the mean fitness errors derived from different variants on all 50D benchmark functions except for those presented in the article's main body.

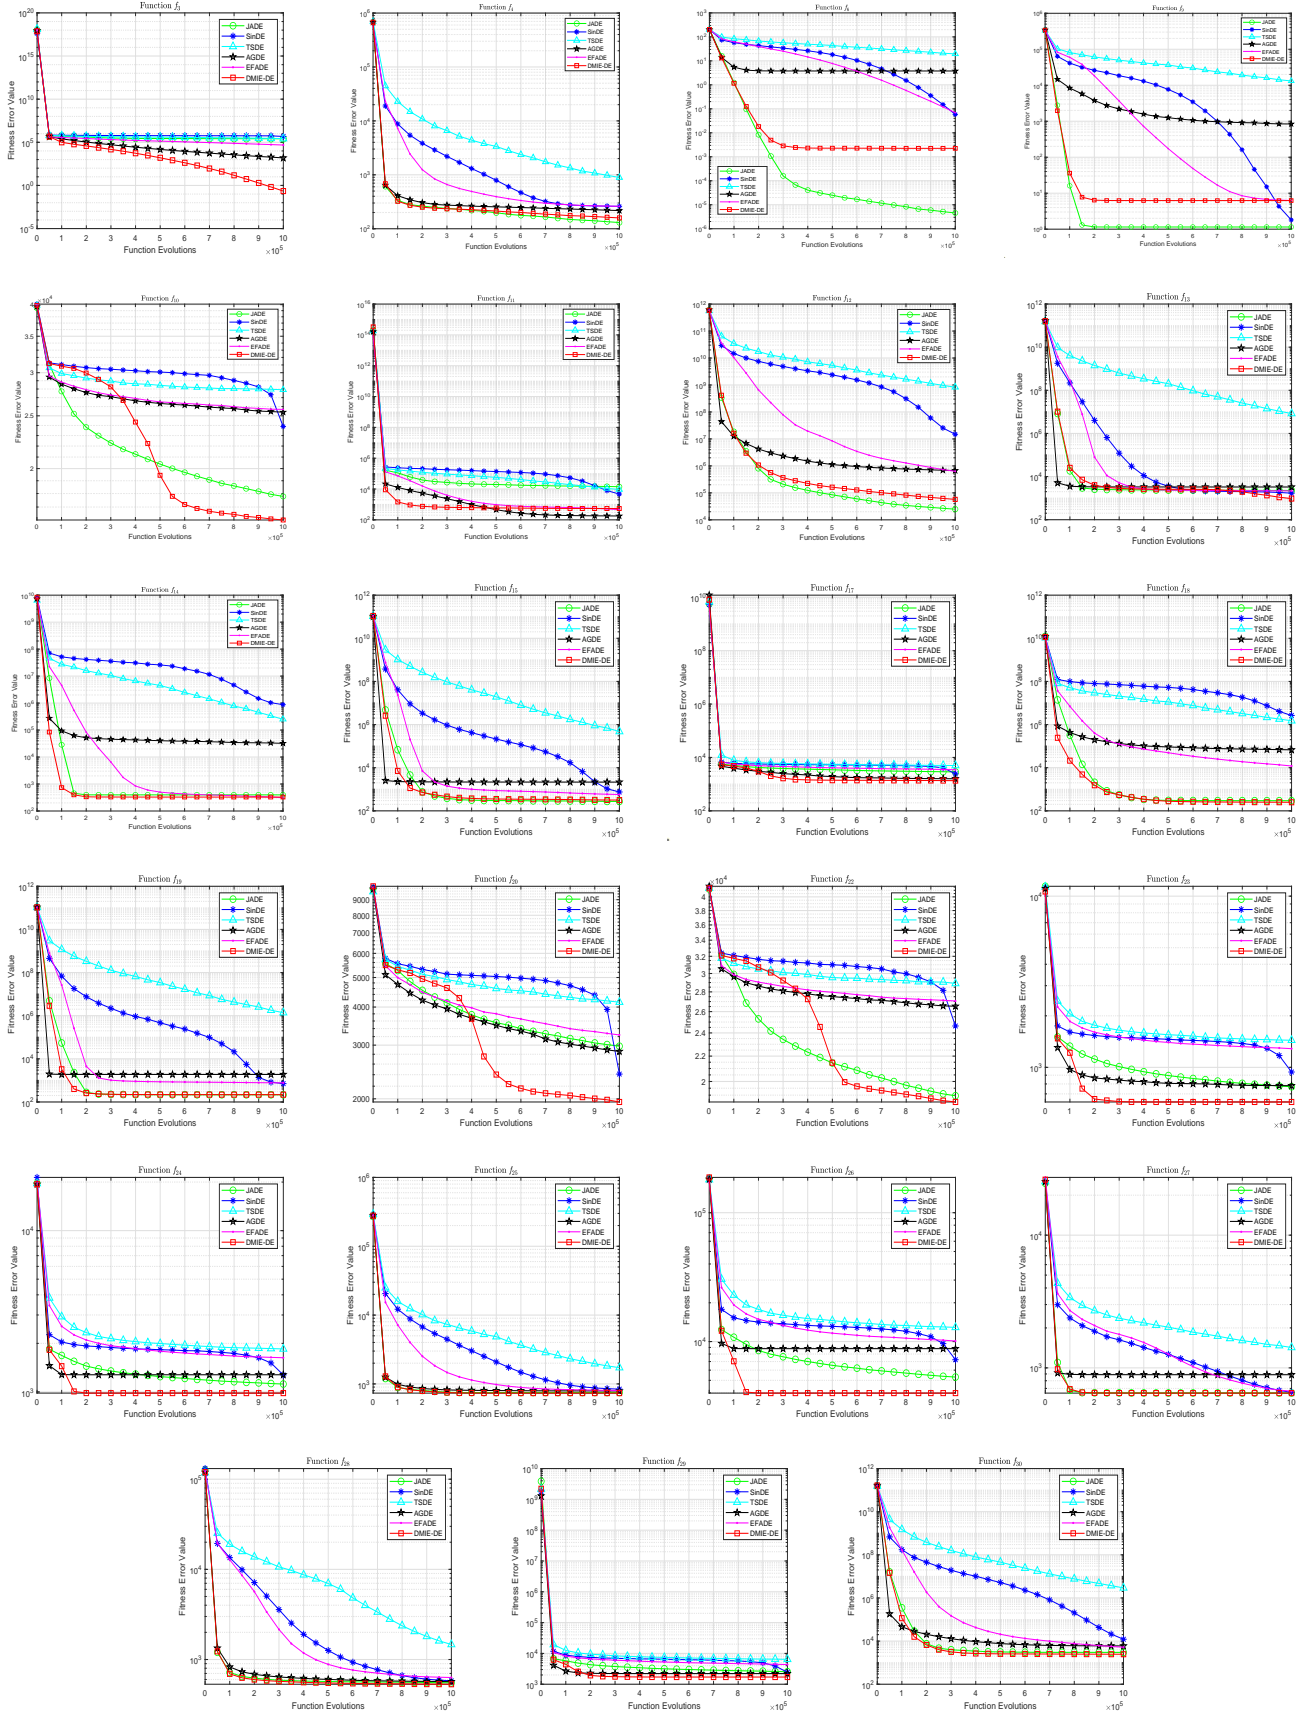

Fig. A3: The convergence process of the mean fitness errors derived from different variants on all 100D benchmark functions except for those presented in the article's main body.

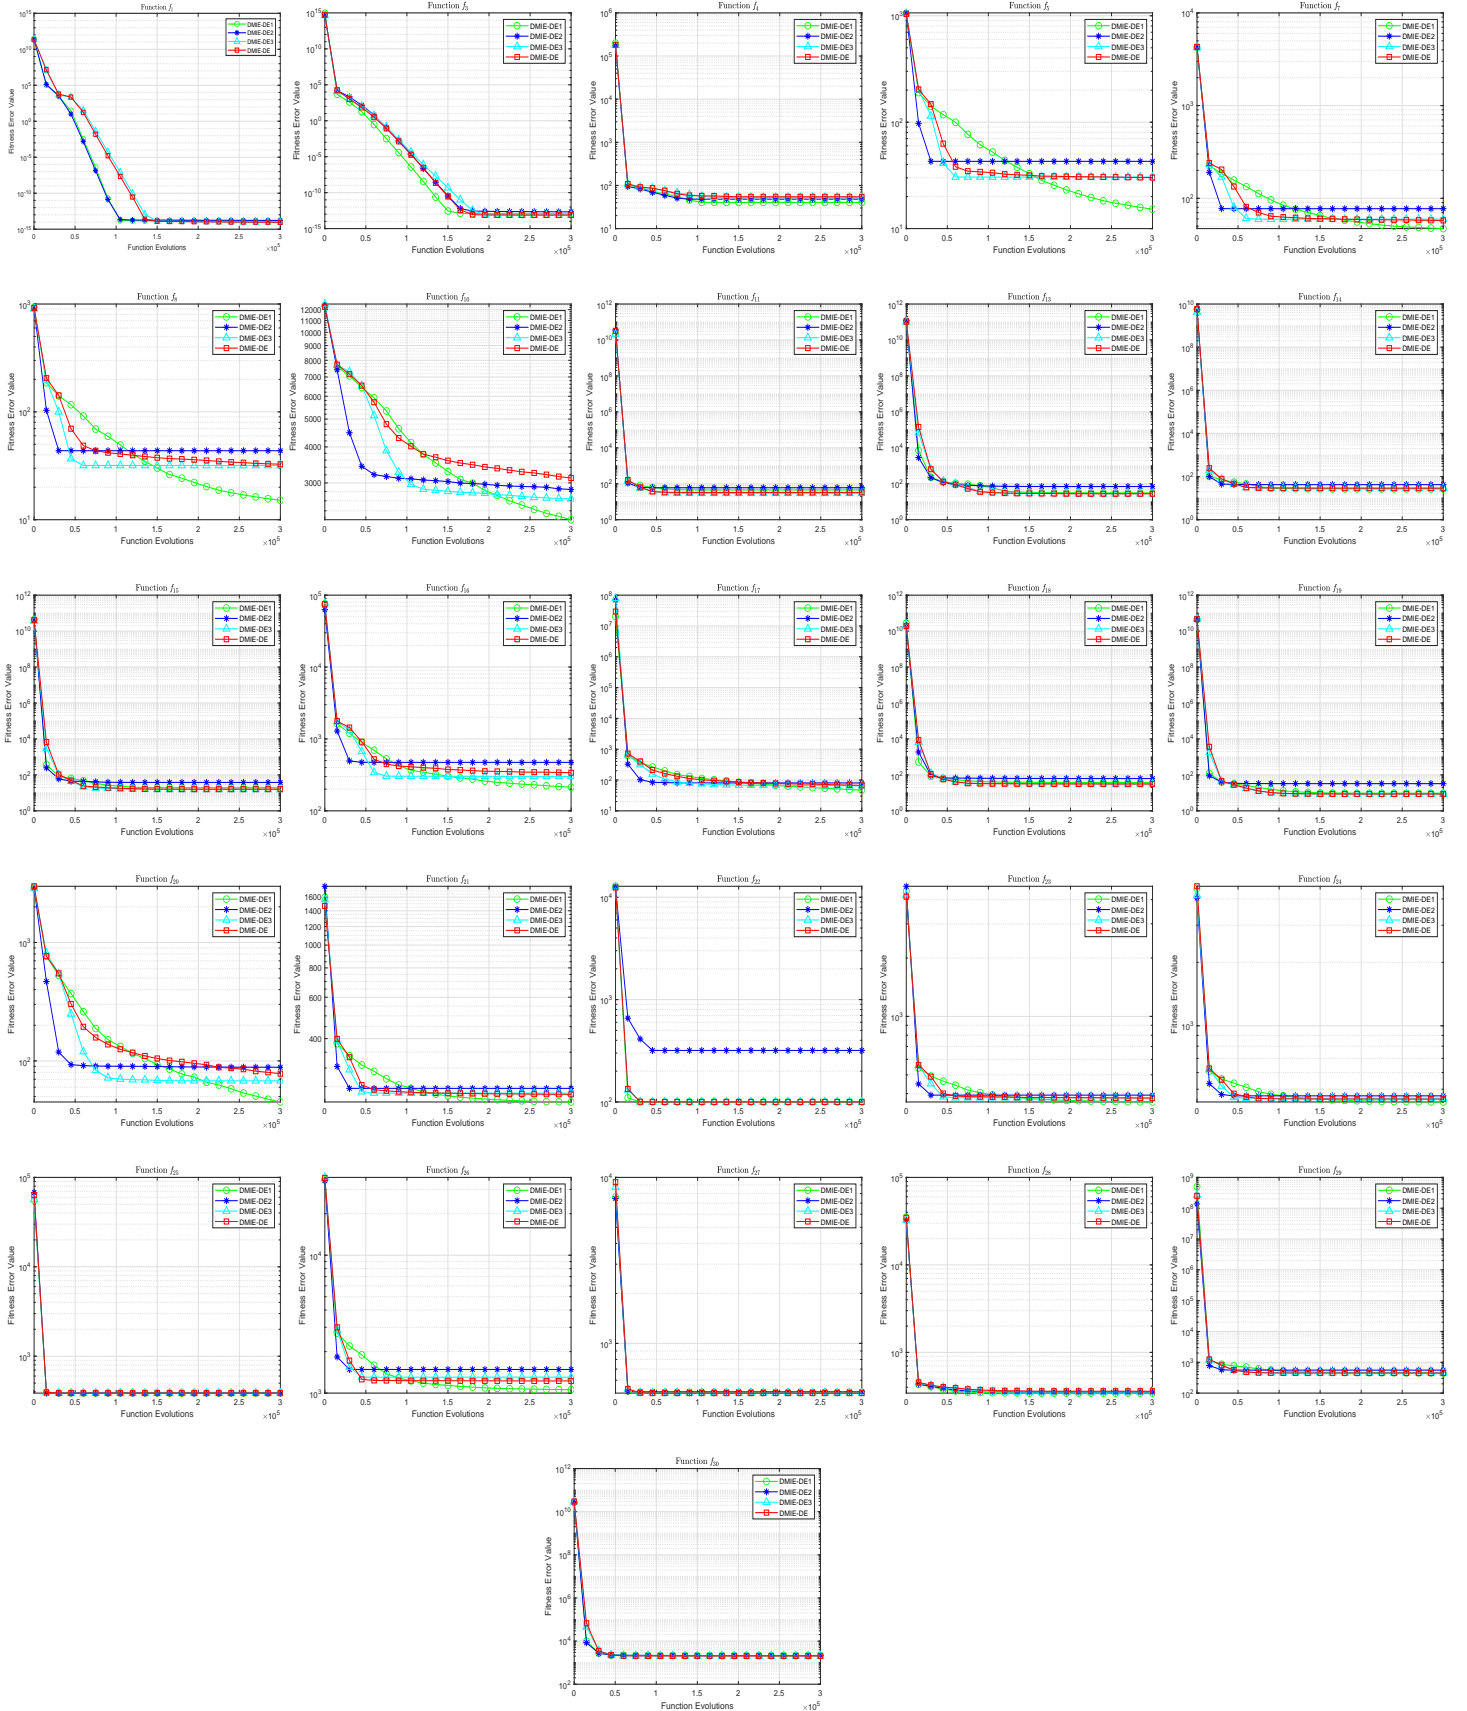

Fig. A4: The convergence process of the mean fitness errors derived from DMIE-DE and its three versions on all 30D benchmark functions except for those presented in the article's main body.



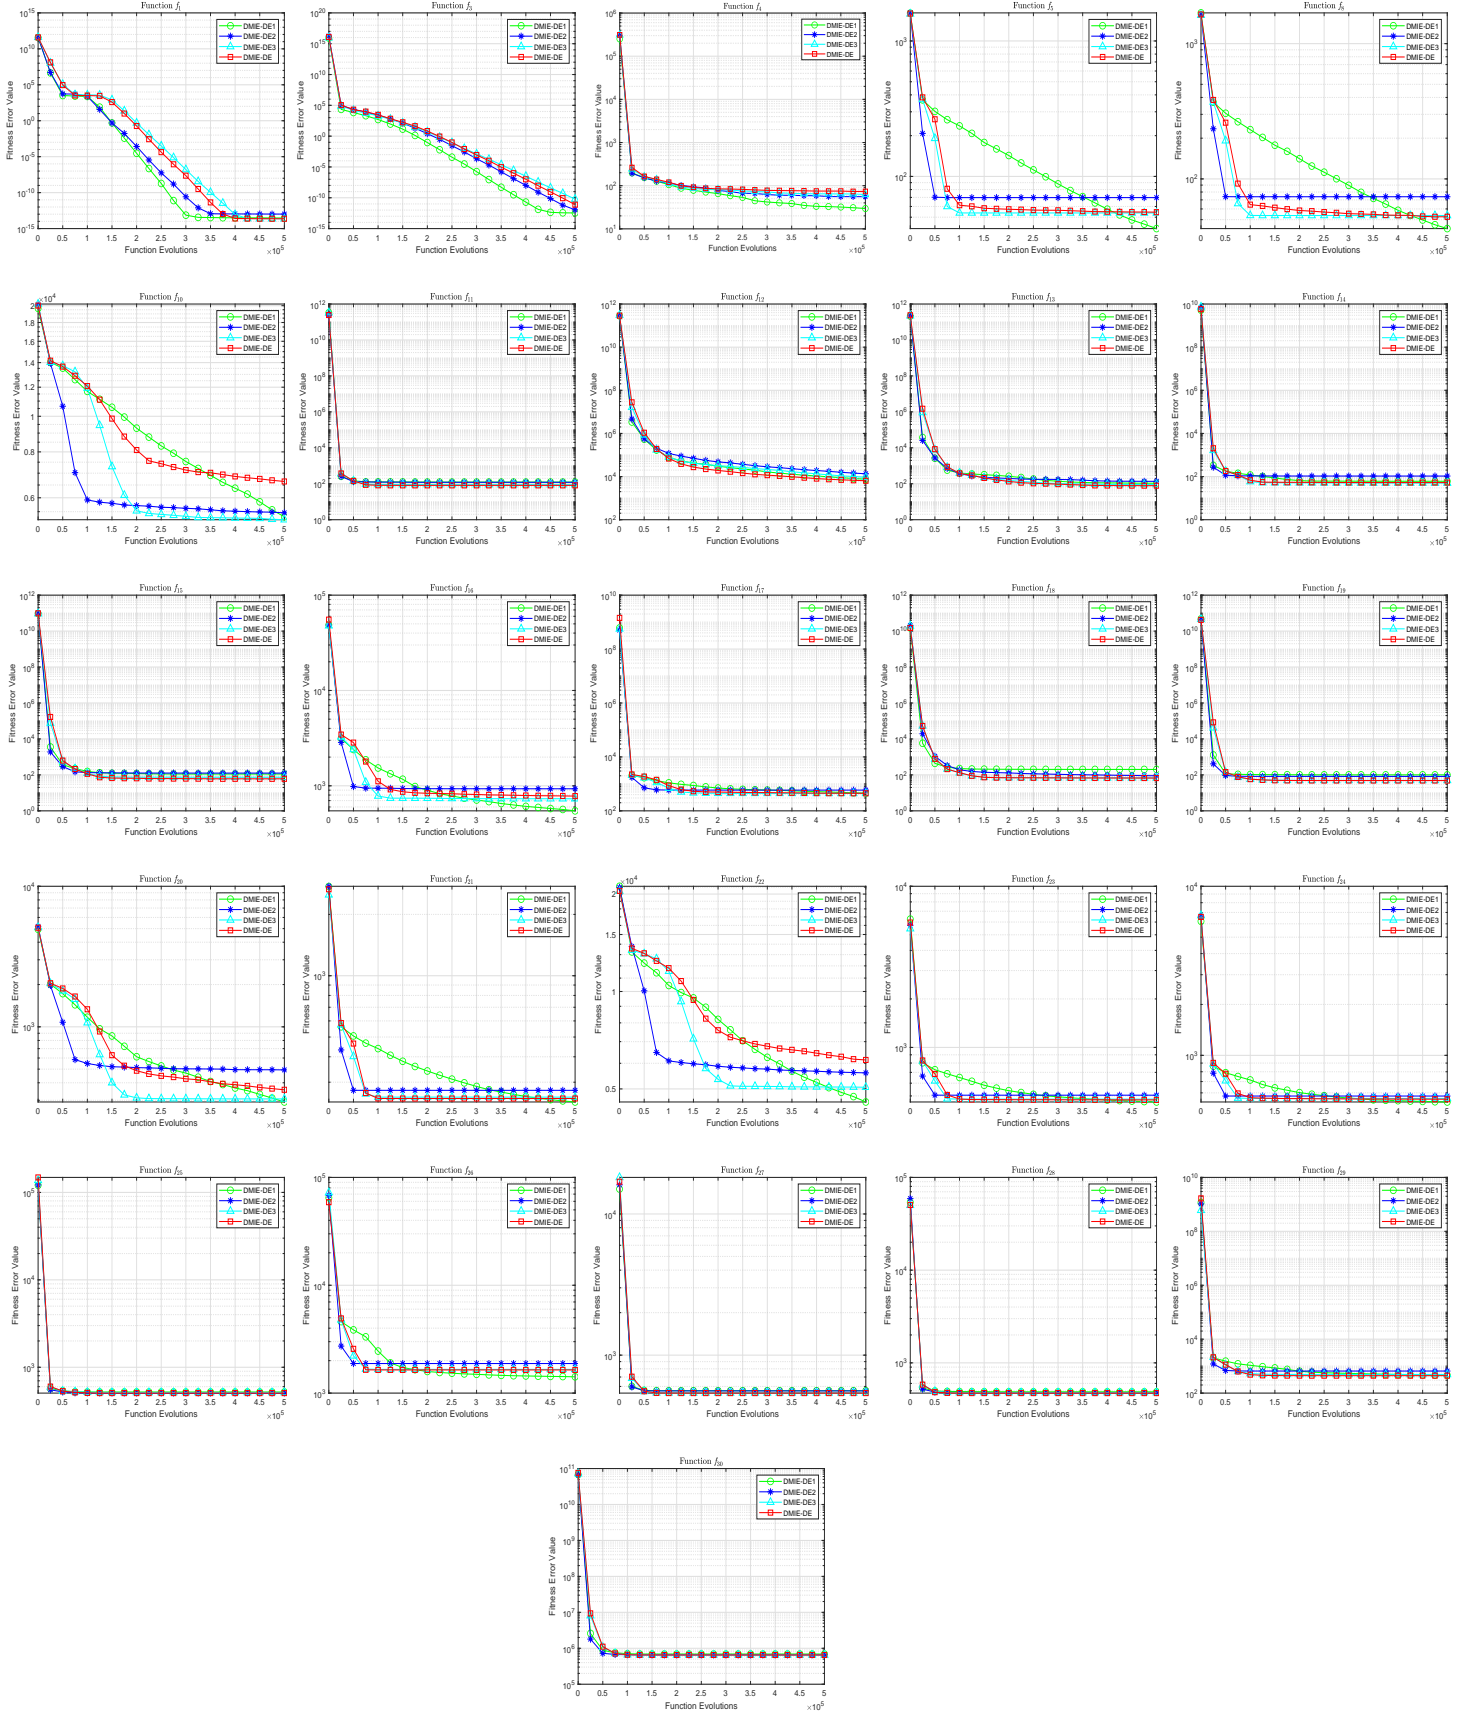

Fig. A5: The convergence process of the mean fitness errors derived from DMIE-DE and its three versions on all 50D benchmark functions except for those presented in the article's main body.

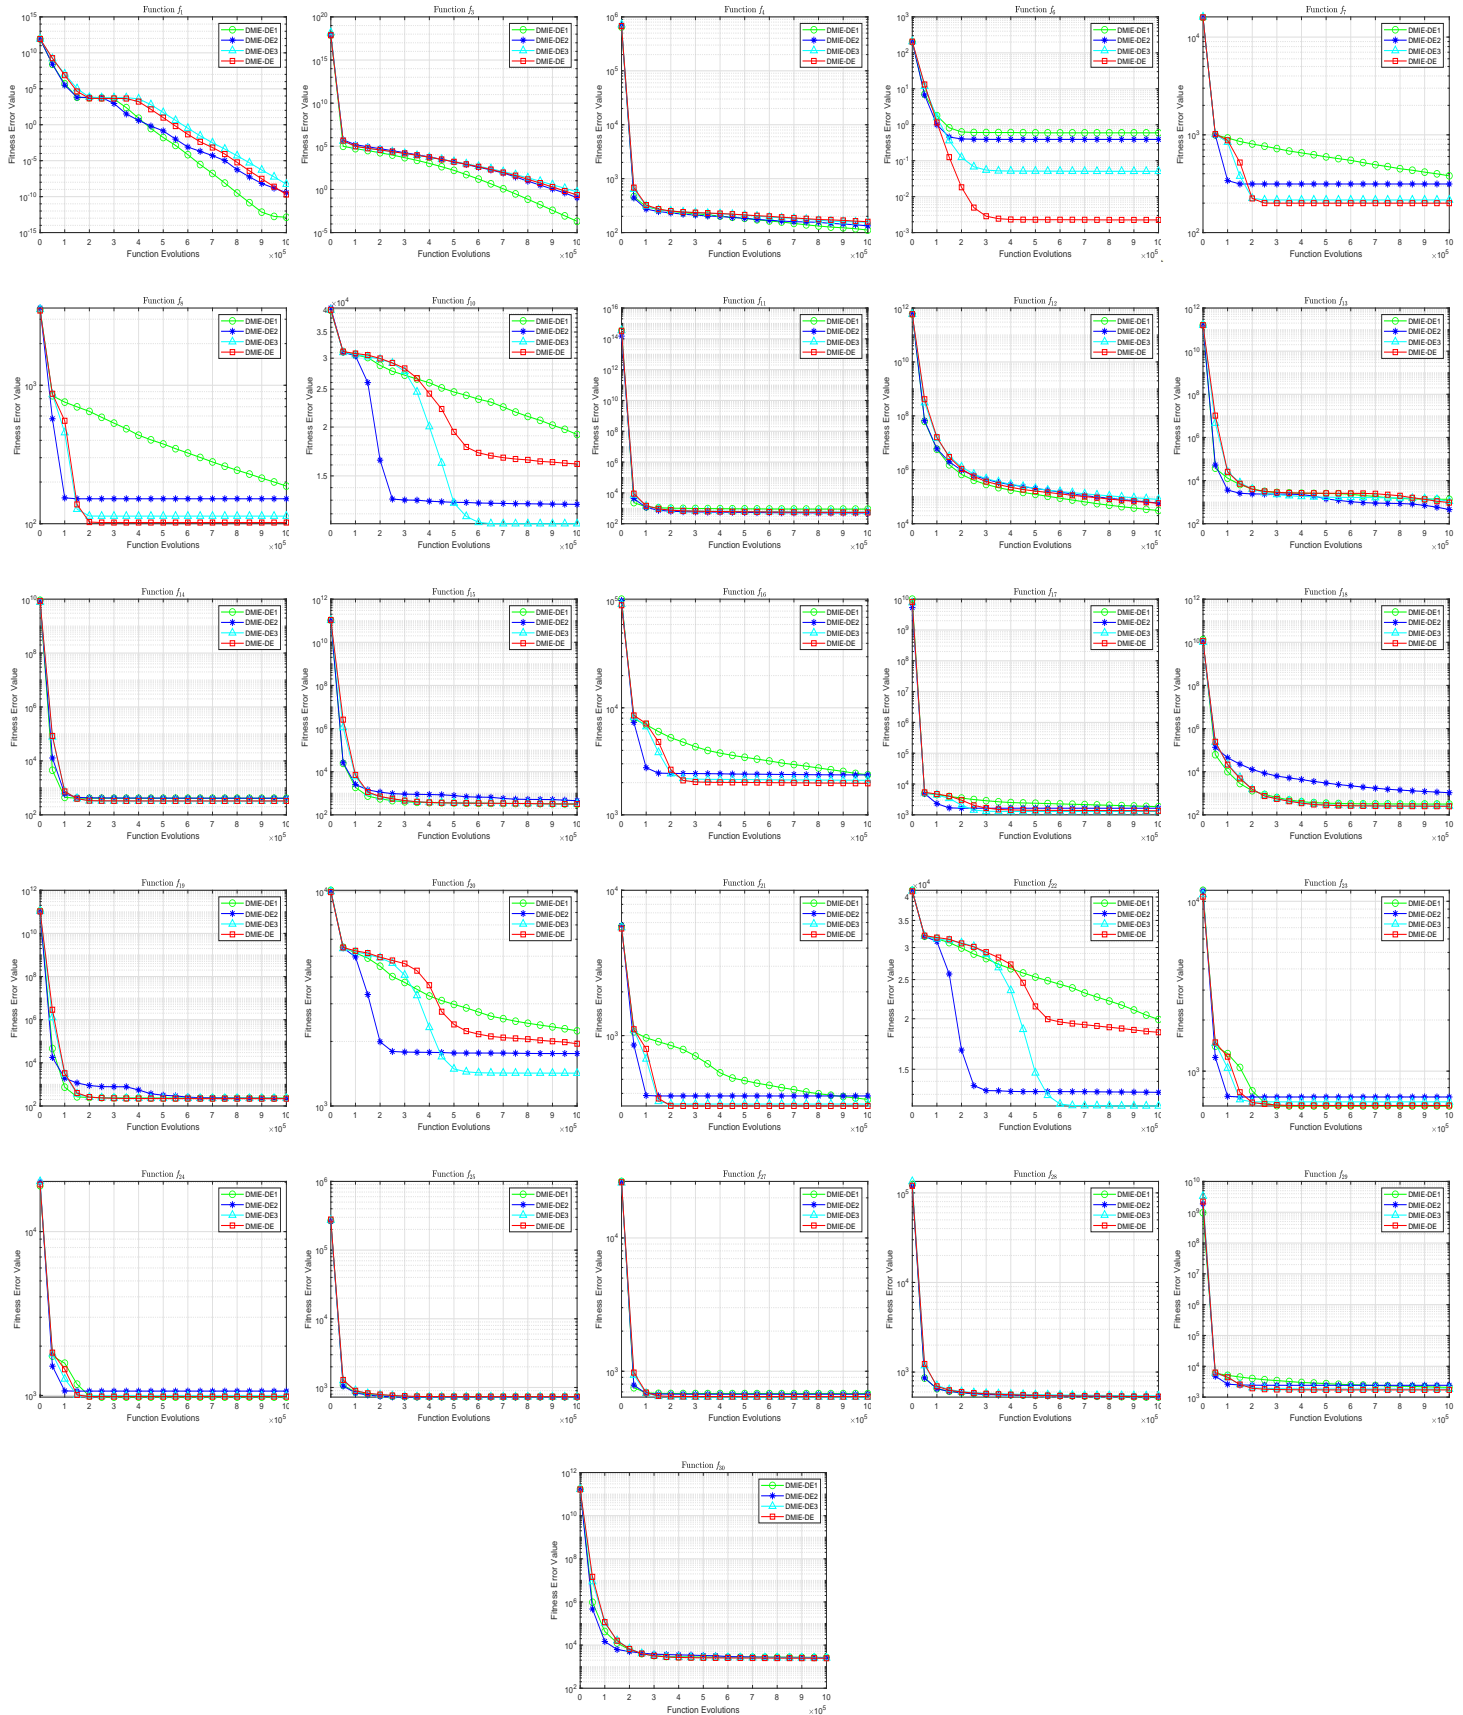

Fig. A6: The convergence process of the mean fitness errors derived from DMIE-DE and its three versions on all 100D benchmark functions except for those presented in the article's main body.
